# Supplementary material for: Cav3.1-driven bursting firing in ventromedial hypothalamic neurons exerts dual control of anxiety-like behavior and energy expenditure
Source: PubMed Central journal article supplement (PMC9156408; doi:10.1038/s41380-022-01513-x), 2022-03-22
Supplement: 41380_2022_1513_MOESM1_ESM.pdf [file 41380_2022_1513_MOESM1_ESM.pdf]

1 **Cav3.1-driven bursting firing in ventromedial hypothalamic neurons**  
2 **exerts dual control of anxiety-like behavior and energy expenditure**

3  
4 Jie Shao<sup>1, 2†</sup>, Da-Shuang Gao<sup>1, 2†</sup>, Yun-Hui Liu<sup>1†</sup>, Shan-Ping Chen<sup>1</sup>, Nian Liu<sup>1</sup>, Lu  
5 Zhang<sup>1</sup>, Xin-Yi Zhou<sup>1</sup>, Qian Xiao<sup>1</sup>, Li-Ping Wang<sup>1</sup>, Hai-Lan Hu<sup>3</sup>, Fan Yang<sup>1,2\*</sup>

6  
7 **Supplementary Materials and Methods**

8 **Animals**

9 All procedures were carried out in accordance with protocols approved by the Ethics  
10 Committee of the Shenzhen Institutes of Advanced Technology, Chinese Academy of  
11 Sciences. Male C57BL/6 mice (4-weeks old) were purchased from the Guangdong  
12 Medical Laboratory Animal Center (Guangzhou, China). The SF-1-Cre mice (stock no:  
13 012462, male) were obtained from Jackson Laboratories (Bar Harbor, ME, USA). Mice  
14 were housed at 22–25 °C on a circadian cycle of 12-hour light and 12-hour dark with  
15 ad-libitum access to food and water.

16 **Chronic stress procedures**

17 All animals (4-weeks old, unless stated elsewhere) used in this study were male, and  
18 randomly assigned to either control or stress groups by someone who blinded to  
19 following experiments for chronic stress study. The stress group was daily subjected to  
20 one stressor which randomly chosen from following: (i) 10 mice squeezing in a  
21 relatively small cage (15 cm×10 cm×4 cm) for two hours. (ii) wet bedding in home  
22 cage overnight (200 ml water was added to moisten bedding). (iii) each mouse was  
23 tightly restraint in a tube for two hours. The chronic stress protocol lasted for 28

24 consecutive days (unless stated elsewhere). Mice in different stress groups received the  
25 same number of each stressor. Control animals were subjected to no stressors. After  
26 chronic stress, all mice were performed behavior test the next day by investigator who  
27 blinded to the group allocation. Mice were sacrificed for *c-fos* staining at 1h after  
28 behavior tests finished.

## 29 **Behavioral tests**

30 *Elevated plus maze (EPM)*. Exposure (5-min) to EPM was used to assess locomotor  
31 activity and anxiety-related behaviors after chronic stress and other treatment, and  
32 experimenter was blind to these treatments. The stress and control groups (n = 10 -  
33 11/group) were placed in the center of the plus maze facing an open arm and behavior  
34 was recorded for the entire 5 min using an overhead-mounted camera. Videos recorded  
35 during the EPM test were analyzed with ANY-maze software (Stoelting Co., Wood Dale,  
36 USA) to acquire data on time spent in open and closed arms, locomotor activity (total  
37 distance travelled in maze), and entries into the open arm. Anxiety-related behavior is  
38 associated with less exploration in the open arm relative to overall exploration of all  
39 arms.

40 *Open field test (OFT)*. Open field exposure (10-min) was performed to assess locomotor  
41 activity and anxiety-related behaviors by experimenter was blind to previous treatments.  
42 Mice (n = 10 - 11/group) were placed in the center of an open field and behavior was  
43 recorded for the entire 10 min. Videos were analyzed to acquire data on time spent in

44 the center and corner areas, total locomotor activity, and number of entries into the  
45 center area. Anxiety-related behavior is associated with less exploration of the center  
46 area.

#### 47 **CLAMS and energy expenditure**

48 To characterize metabolic changes caused by chronic stress or other treatments, RER  
49 was measured by indirect calorimetry using a four-chamber open-circuit calorimeter  
50 (Oxymax Series; Columbus Instruments, Columbus, OH, USA). Mice were food  
51 deprived overnight, with body weight and chow in each cage weighed prior to the  
52 experiment. During the experiment, mice were housed individually in specially built  
53 Plexiglas cages (40 × 25 × 20 cm). Temperature was maintained at 22 °C with an airflow  
54 of 0.5 per min. Food and water were available *ad libitum*. Mice were subsequently  
55 monitored in the system for 24 h (whole light-dark cycle). Oxygen consumption (VO<sub>2</sub>)  
56 and carbon dioxide production (VCO<sub>2</sub>) were measured every 10 min. The RER was  
57 calculated as a quotient of VCO<sub>2</sub>/VO<sub>2</sub>, with 1 representing 100% carbohydrate  
58 oxidation and 0.7 representing 100% fat oxidation. Energy expenditure (kcal heat  
59 produced) was calculated as calorific value (CV) × VO<sub>2</sub>, where CV is 3.815 + 1.232 ×  
60 RER<sup>1</sup>. Metabolic data collected from the 24-h monitoring period were averaged for  
61 energy expenditure and RER. After the experiment, chow in each cage was weighed to  
62 calculate food intake.

#### 63 **Slice preparation**

64 Mice were deeply anesthetized with isoflurane and decapitated rapidly. Brains were  
65 then removed and transferred to chilled cutting solution within 3 min. Cutting solution  
66 contained (in mM): choline chloride 110; KCl 2.5; Na-pyruvate 0.6; MgCl<sub>2</sub> 7.0; CaCl<sub>2</sub>  
67 0.5; NaH<sub>2</sub>PO<sub>4</sub> 1.3; NaHCO<sub>3</sub> 25; glucose 20 (pH 7.4). The chilled cutting solution was  
68 bubbled with carbogen (95% O<sub>2</sub> and 5% CO<sub>2</sub>) for at least 30 min before use. Coronal  
69 slices (250–300 μm thick) were prepared on a vibratome (Series 1000, Warner  
70 Instruments, Berlin, Germany), and incubated in artificial cerebrospinal fluid (ACSF)  
71 containing (in mM): NaCl 125; KCl 2.5; Na-pyruvate 0.6; MgCl<sub>2</sub> 1.3; CaCl<sub>2</sub> 2.0;  
72 NaH<sub>2</sub>PO<sub>4</sub> 1.3; NaHCO<sub>3</sub> 25; glucose 10 (pH 7.4) bubbled with carbogen at 34 °C for 30  
73 min. After incubation, all slices were equilibrated in ACSF at room temperature (24–  
74 26 °C) for at least 40 min. Single slices were placed on the recording chamber perfused  
75 with ACSF bubbled with carbogen at room temperature. Unless stated otherwise, drugs  
76 were applied with perfused ACSF.

## 77 **Electrophysiology**

78 Whole-cell patch clamp recording was performed on VMH neurons by experimenter  
79 blind to the treatment of mice. The dmVMH was identified based on landmarks (third  
80 ventricle). Recordings were obtained with multi-clamp 700B amplifiers (Molecular  
81 Devices, San Jose, USA) under visual guidance using a Nikon FN1 microscope (Tokyo,  
82 Japan). Electrophysiological data were acquired and analyzed using pClamp 10  
83 software (Molecular Devices, San Jose, USA). Whole-cell recordings were performed

84 with borosilicate glass electrodes (0.69 mm OD, 5–7 M $\Omega$ ) with internal solution  
85 containing (in mM): K-gluconate 135.0; KCl 4.0; NaCl 2.0; HEPES 10; EGTA 4.0; Mg-  
86 ATP 4.0; Na-GTP 5.0. Osmolality was adjusted to 290–310 mOsm kg<sup>-1</sup> with sucrose  
87 and pH was adjusted to 7.4 with KOH.

88

89 After forming a high-resistance seal (G $\Omega$ ), the cell was held in current-clamp mode for  
90 7–10 min until access resistance stabilized. Resting membrane potential (RMP) was  
91 assessed at the beginning of the recording period after stabilization of access resistance,  
92 and periodically monitored throughout the recording by momentarily relieving the  
93 direct current injection. To elucidate differences among neurons, 800-ms current  
94 injections (-100 to 100 pA in 10 pA increments; 5 s interstimulus interval) were applied,  
95 and the number of action potentials evoked by each current injection, input resistance,  
96 and half-width of action potentials were determined.

### 97 **Immunohistochemistry**

98 Mice were first anesthetized by chloral hydrate (10% in saline, 1 ml/100 g,  
99 intraperitoneally), then perfused with 0.01 M PBS and 50 mL of 4% PFA transcardially.  
100 Brains were dissected and post-fixed in 4% PFA overnight and then transferred to 30%  
101 w/v sucrose solution for cryoprotection until sinking. Sections from the entire anterior-  
102 posterior range of the VMH were stained using an antibody specific to Cav3.1 (1: 100,  
103 Alomone labs, Cat# ACC-021, RRID: AB\_2039779), Cav3.2 (1: 100, Alomone labs,  
104 Cat#ACC-025, RRID: AB\_2039781), Cav 3.3(1: 100, Alomone labs, Cat# ACC-009,

105 RRID: AB\_2039783), or *c-fos* (1: 200, Cell signaling, Cat# 4384, RRID:AB\_2106617).  
106 Briefly, sections were washed, permeabilized in 0.1% Triton X-100/PBS for 15  
107 min/three times, washed again, and blocked in 10% normal goat serum (NGS) (w/v)/0.1%  
108 Triton X-100/PBS for 30 min. Primary antibody was added, and sections were  
109 incubated overnight at 4 °C. The following day, sections were washed with 0.01 mM  
110 PBS, incubated with secondary antibody (Alexa Fluor 594 Goat Anti-Rabbit, Cat#115-  
111 585-003, RRID: AB\_2338059 or Alexa Fluor 488 Goat Anti-Rabbit, Cat#111-547-003  
112 RRID: AB\_2338058, Jackson) in 1% NGS/0.1% Triton X-100/PBS for 1 h at room  
113 temperature, then washed, mounted, and cover slipped with mounting medium  
114 containing DAPI (Vector labs, Burlingame, USA).

#### 115 **Drugs and reagents**

116 Fluoxetine and all chemicals included in ACSF prescription were purchased from  
117 Sigma-Aldrich (Merck KGaA, Darmstadt, Germany). Mibefradil (10 μM) were  
118 purchased from Tocris (Bio-Techne, Minneapolis, USA) and used for electrophysiology  
119 and microinjection. NBQX (1,2,3,4-tetrahydro-6-nitro-2,3-dioxo-benzo[f]quinoxaline  
120 -7-sulfonamide, 30 μM), 5-HT (40 μM) and AP5 (2-amino-5-phosphono -pentanoic  
121 acid, 30 μM) were acquired from Med Chem Express (MCE, Shanghai, China).

#### 122 **ELISA tests for signaling pathway**

123 After all treatment, mice of each group were anesthetized with isoflurane and brains  
124 were acute cut in cold phosphate-buffered saline (PBS) solution. Protein concentration

125 was determined using BCA kit (23225, ThermoFisher, US) after lysis by commercial  
126 cell lysis solution (P0013B, Beyotime Biotechnology, China) according to the  
127 manufacturer instructions. ELISA tests were performed using the following ELISA kits:  
128 Mouse cAMP ELISA Kit (KS13362, Shanghai KESHUN, China), Mouse PKA ELISA  
129 Kit (MM-44733M1, Shanghai MLBIO, China) and Mouse cAMP response element  
130 binding protein (CREB) ELISA Kit (CSB-E15860m, CUSABIO, China). All  
131 experiments are performed according manufacturer instructions.

### 132 **Cell harvesting and single-cell Quantitative real-time polymerase chain reaction** 133 **(qRT-PCR)**

134 Single Cell-to-CT™ Kits (Thermo Fisher, USA) were used to perform single-cell qRT-  
135 PCR. After recording, single cells were collected after patch clamp recording and lysed  
136 to acquire total RNA. Mastercycler 5333 PCR thermal cycler (Eppendorf, Germany)  
137 was used to perform reverse transcription and pre-amplification. TaqMan gene  
138 expression assay was used to assay each gene. Gene expression levels were normalized  
139 to the expression of housekeeping gene *Rn18s*. All protocols were performed according  
140 to the manufacturer's instructions. qRT-PCR was performed with a Light cycler 480  
141 (Roche, Switzerland).

### 142 **Tissue collection and qRT-PCR**

143 To acquire dmVMH tissue, mice were first anesthetized with isoflurane. After bathing  
144 in cold 1% diethyl pyrocarbonate (DEPC) phosphate-buffered saline (PBS) solution,

145 brains were acute cut on a vibratome. VMH tissues were dissected microscopically  
146 from those sections, and quickly transferred to TRIzol reagent. The manufacturer's  
147 standard protocols for RNA extraction (TransGene, China) and synthesis (TOYOBO,  
148 Japan) were followed. Primers used for qRT-PCR included: Cav 3.1 (5'-TGG  
149 CCTTCTTCGTCCTGAAC-3' and 5'-TTCTCCAGCCTCTTTAGTCGC-3'). Cav 3.2  
150 (5'-CGGCCCTACTACGCAGACTA-3' and 5'-TTAAGGGCCTCGTCCAGAGA-3'),  
151 Cav 3.3 (5'-CTGCTATTCTCCAGCCCAGG-3' and 5'-AGCTGCACCTCTTG  
152 CTTGT-3'). Expression of these gene was normalized to the expression of  
153 housekeeping gene  $\beta$ -Actin (*Act-b*).

#### 154 **Fiber photometry recording**

155 Fiber photometry (ThinkerTech, Nanjing, China) <sup>2</sup> was utilized to record calcium  
156 activity in VMH. We injected 200 nL of AAV-Flex-GCaMP6s (Taitool Bioscience,  
157 Shanghai, China) and implanted optical fiber (200  $\mu$ m OD, 0.37 NA, Newdoom,  
158 Hangzhou, China) into the VMH of SF-1 cre mice. To figure out the difference in  
159 spontaneous calcium activity between control and stressed mice, GCaMP6s was  
160 injected into VMH after 4-weeks chronic stress and photometry recording has been  
161 preformed 4-weeks after surgery. Photometry recording and behavioral tests started at  
162 same time to synchronize the timeline of calcium signals and behavior video. Data  
163 recorded before and after mice entering anxiogenic contexts (central zone of open field  
164 and open arms of EPM) was analyzed. To test the effect of periodic optogenetic  
165 inhibition on the neural activity of SF-1 neurons, GCaMP6s was injected with AAV9-



166 DIO-NpHR-mCherry (AAV9-DIO-mCherry as control group, Brain VTA, Wuhan,  
167 China) into dmVMH. In the RNAi knockdown study, GCaMP6s was injected with  
168 shRNA-Cav3.1 vector (shRNA vector as negative control, WZ Bioscience, Jinan, China)  
169 into VMH of SF-1 cre mice prior to 4-weeks chronic stress. Mice were housed at least  
170 3 weeks before experiments to ensure virus expression. The 473 nm and 580 nm laser  
171 beam were reflected off a dichroic mirror and focused by objective lens to excite  
172 GCaMP6s fluorescence and NpHR channels respectively. Calcium fluorescence signals  
173 was collected by a photomultiplier tube and then converted into electrical signals  
174 (100Hz). The  $\Delta F/F$  values were calculated by  $(F/F_{\text{mean}} - 1) \times 100\%$ ,  $F_{\text{mean}}$  was  
175 determined by average fluorescence intensity throughout recording. Calcium signal  
176 wave higher than  $\mu + 3\sigma$  was regarded as a fluorescence transient ( $\mu$  and  $\sigma$  represents  
177 the average and the standard deviation of the baseline signal)<sup>3</sup>. Recording traces were  
178 visualized using Prism 7 (GraphPad Software, La Jolla, CA, USA) and custom  
179 MATLAB (MathWorks, Natick, USA) scripts produced by Thinker Biotech.

### 180 ***In vivo* electrophysiology**

181 After 4-weeks chronic stress, mice were implanted with two nickel-chromium wires  
182 (25- $\mu\text{m}$  diameter; AM Systems, Sequim, USA) targeting the dmVMH, connector was  
183 bind to wires and fixed on skull with dental cement. After recovery (1 week) from  
184 surgery, mice were returned to the recording sessions. Neuronal activity was collected  
185 using a Plexon Multichannel Acquisition Processor system (Plexon, Dallas, USA).  
186 Local field potentials (digitized at 1 kHz sampling rate, low-pass filtered up to 250 Hz)

187 were recorded simultaneously for 90 min with a gain of 5 000×. After the recording  
188 sessions, mice were anesthetized by pentobarbital sodium and perfused intracardially.  
189 The electrode recording position was marked by histological staining.

#### 190 **Stereotaxic surgery and viral injection**

191 For all stereotaxic surgery, mice were anesthetized by pentobarbital sodium (0.3% in  
192 saline, 1 ml/100 g, intraperitoneally) and placed in a stereotaxic apparatus for surgery.  
193 Stereotaxic surgical procedures were performed using standard protocols. To target the  
194 dmVMH, bilateral brain injection coordinates relative to bregma were chosen (AP, -  
195 1.58 mm; ML, ±0.3 mm; DV, -5.5 mm). Unless stated otherwise, 0.2 μL of viral vector  
196 was injected into the VMH at a rate of 0.1 μL/min using a 10-μL Hamilton syringe and  
197 a syringe infusion pump (World Precision Instruments, USA).

198

199 For RNAi knockdown study, 5-weeks old SF-1 cre mice were divided into four groups,  
200 including control group (no treatment), stress group (chronic stress), stress + vector  
201 (chronic stress and AAV vector injected) and stress + Cav 3.1<sup>-</sup> group (chronic stress and  
202 AAV-shRNA injected). Cav3.1-shRNA (AAV-CMV-GFP-shCACNA1Gmir30-bGHpA,  
203 WZ Bioscience, Jinan, China) or control vector (AAV-CMV-GFP-Scramble-bGHpA,  
204 WZ Bioscience, Jinan, China) was used to record calcium signals in VMH was injected  
205 into the VMH of mice in RNAi group before chronic stress. Mice were housed for five  
206 weeks (4-days recovery and 4-weeks chronic stress) before anxiety-like behavior and  
207 metabolic tests. To assess the knockdown effectiveness of Cav 3.1 shRNA, mice were

208 perfused with 4% paraformaldehyde (PFA) and brain tissues were removed for  
209 immunostaining analysis after the final session.

210

211 For microinjection, a stainless-steel guide-cannula (0.6 mm outer diameter and 0.4 mm  
212 inner diameter, RWD, Shenzhen, China) was implanted into the diencephalon to target  
213 the VMH (AP, -1.58 mm; ML,  $\pm 0.3$  mm; DV, -5.0 mm) after 4-weeks chronic stress.

214 The guide-cannula was fixed to the skull using dental cement and three stainless steel  
215 screws. Each guide-cannula was sealed with a stainless-steel wire for protection from  
216 obstruction. Before behavioral testing, the stainless-steel wire was replaced with an  
217 injection cannula (0.5 mm deeper than guide-cannula to break astrocyte aggregation),  
218 through which the drug dissolved in saline (200 nl) was delivered at 100 nl/min into the  
219 VMH. After microinjection, mice were rested for 30 min before tests.

## 220 **Wireless optogenetic manipulation**

221 To achieve wireless optogenetic manipulation of burst firing neurons, AAV9-DIO -  
222 NpHR-mCherry or AAV9-DIO-mCherry (Brain VTA, Wuhan, China) was injected  
223 unilaterally into the VMH in the left hemisphere. Mice were housed for four weeks  
224 following injection for viral expression before initiation of experiments. A copper coil  
225 with a light emitting diode (LED) on the right side of the tip (Inper, Hangzhou, China)  
226 was implanted into the brain of NpHR-expressing mice, with the LED located 0.2  $\mu$ m  
227 left of the dmVMH. The coil and indicator were fixed on the surface of the skull bone  
228 with Vetbond Tissue Adhesive (3M, USA). Charging the coil was achieved through

229 antennas surrounding the cage, and the antennas was adjusted to ensure  $\sim 10$  mw/mm<sup>2</sup>  
230 power density of yellow light. To initiate burst firing of dmVMH neurons, 550-nm  
231 yellow light stimulation was performed at 0.1 Hz (2 s/pulse) in the NpHR-mCherry  
232 group during the metabolic (one illumination trial/12 h, each trial lasted for 2 h) and  
233 behavioral tests (OFT, 10 min; EPM, 5 min).

#### 234 **Statistical analysis**

235 Initial sample sizes were established at  $n = 6$ /group at least which similar to our previous  
236 publication, and final sample size was adjusted to account for experiment interrupted  
237 or failure of acquiring complete data, such as virus or fiber implant missing. Slice  
238 electrophysiological data were analyzed with pCLAMP (Molecular Device, San Jose,  
239 CA, USA). *In vivo* electrophysiology data were analyzed with NeuroExplorer 5.0  
240 (Plexon, Dallas, USA). All data were imported into Prism 7 (GraphPad Software, La  
241 Jolla, CA, USA). To verify the appropriateness of the following statistical analyses,  
242 normality was assessed using D'Agostino-Pearson test and Kolmogorov-Simimov test,  
243 and variance was compared using F test. Unless stated otherwise, the data are presented  
244 as means  $\pm$  SEM. Statistical significance was determined using two-tailed unpaired  
245 Student's *t*-tests, Mann-Whitney U test (data did not follow normal distribution or not  
246 pass the F test) and one-way analysis of variance (ANOVA) with Bonferroni when  
247 comparing two groups or more, two-tailed paired Student's *t*-test when comparing the  
248 effects of different treatments in the same group. When multiple measures were  
249 compared between groups (e.g., current-frequency curves), repeated measures two-way

250 ANOVA with Bonferroni correction was used. Differences were considered significant  
251 at  $P < 0.05$ .

252

253 To classify dmVMH neurons, unsupervised cluster analysis was performed with SPSS  
254 v19 (Chicago, IL, USA) using squared Euclidean distances. The parameters for cluster  
255 analysis were chosen based on their lack of linear correlation with each other. The  
256 following electrophysiological parameters were included for analysis: onset time,  
257 evoked firing rate, input resistance, and potential sag by H-current (Hyperpolarization-  
258 activated current). Resting potential were excluded from the parameters for cluster  
259 analysis because of their linear correlation with onset times. All electrophysiological  
260 parameters were converted into standardized z-scores before clustering.

261

## 262 **References**

- 263 1. Hardaway JA, Halladay LR, Mazzone CM, Pati D, Bloodgood DW, Kim M *et al.*  
264 Central Amygdala Prepronociceptin-Expressing Neurons Mediate Palatable  
265 Food Consumption and Reward. *Neuron* 2019; **102**(5): 1088.  
266
  - 267 2. Cao P, Chen C, Liu A, Shan Q, Zhu X, Jia C *et al.* Early-life inflammation promotes  
268 depressive symptoms in adolescence via microglial engulfment of dendritic  
269 spines. *Neuron* 2021; **109**(16): 2573-2589.e2579.  
270
  - 271 3. Xia G, Han Y, Meng F, He Y, Srisai D, Farias M *et al.* Reciprocal control of obesity  
272 and anxiety-depressive disorder via a GABA and serotonin neural circuit.  
273 *Molecular psychiatry* 2021.  
274
- 275
