# Supplementary material for: Cav3.1-driven bursting firing in ventromedial hypothalamic neurons exerts dual control of anxiety-like behavior and energy expenditure
Source: PubMed Central journal article supplement (PMC9156408; doi:10.1038/s41380-022-01513-x), 2022-03-22
Supplement: 41380_2022_1513_MOESM2_ESM.pdf [file 41380_2022_1513_MOESM2_ESM.pdf]

1 **Cav3.1-driven bursting firing in ventromedial hypothalamic neurons**  
2 **exerts dual control of anxiety-like behavior and energy expenditure**

3

4 **Supplementary Information**

5 **This file includes:**

6

7       Supplementary Fig. 1 to 9

8       Supplementary Table 1

9

10 **Supplementary Table 1. Electrophysiological properties of three dmVMH**  
11 **neuronal subtypes**

|                                         | Silent<br>(n = 19) | Tonic-firing<br>(n = 38) | Bursting<br>(n = 28) |
|-----------------------------------------|--------------------|--------------------------|----------------------|
| Input resistance (MΩ)                   | 535.30 ± 21.83     | 661.72 ± 19.84           | 662.72 ± 24.21       |
| Onset Time (ms, 50 pA)                  | 37.17 ± 2.53       | 18.20 ± 1.28             | 25.84 ± 1.87         |
| RMP (mV)                                | -65.27 ± 1.08      | -57.50 ± 0.92            | -63.39 ± 1.07        |
| Overshoot by H-current<br>(mv, -100 pA) | 7.26 ± 1.17        | 10.71 ± 0.94             | 12.01 ± 1.19         |
| Evoke firing rate (Hz, 100<br>pA)       | 17.53 ± 0.60       | 21.76 ± 0.50             | 22.00 ± 0.73         |
| AHP (mV)                                | -12.38 ± 0.53      | -15.2 ± 0.50             | -14.26 ± 0.65        |
| Half width (ms)                         | 2.17 ± 0.08        | 2.00 ± 0.04              | 2.04 ± 0.05          |
| AP amplitude (mV)                       | 71.79 ± 1.88       | 73.29 ± 1.25             | 73.29 ± 1.28         |

12 Data are represented as mean ± SEM. RMP: resting membrane potential; H-current:  
13 hyperpolarization-activated current; AHP: after-hyperpolarization potential; AP: action  
14 potential.

15

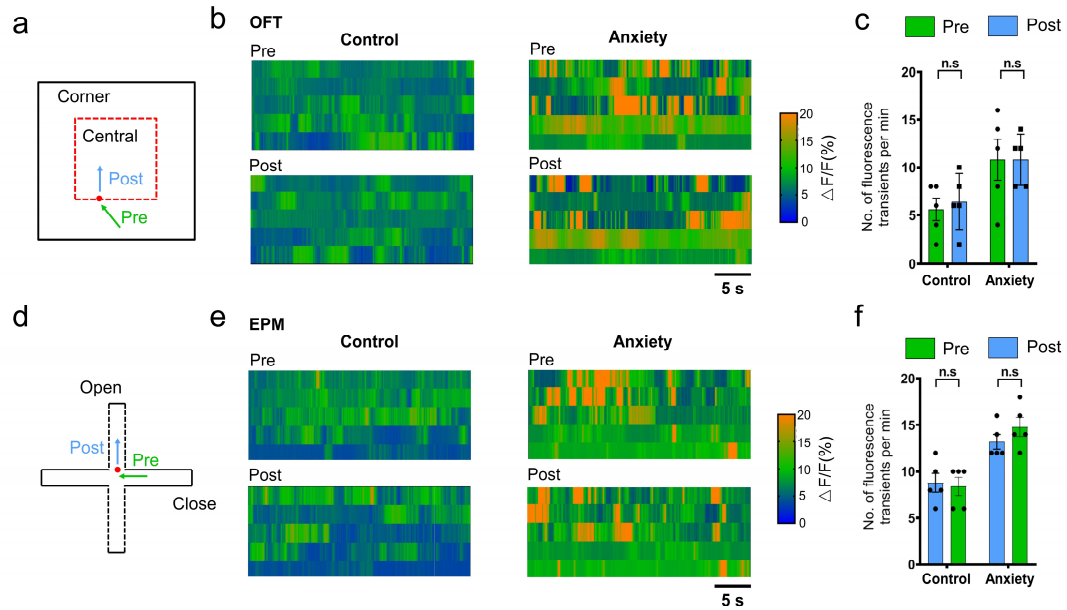

16

17 **Supplementary Figure 1. *In vivo* photometry recording of dmVMH neurons in**  
 18 **control and stressed mice during behavioral tests.**

19 (a) Schematic of photometry recording during open field test (OFT). (b) Heat maps and  
 20 (c) statistics analysis demonstrated no obvious change of spontaneous calcium signals  
 21 ( $dF/F$ ) of SF-1 neurons before and after mice entering central area, regardless of control  
 22 or anxiety groups (unpaired Student's *t*-test, control,  $P = 0.6626$ ; anxiety,  $P = 0.9999$ ).

23 (d) Schematic of photometry recording during the exploration in elevated plus maze  
 24 (EPM). (e) Heat maps and (f) statistics analysis suggested that there is no significant  
 25 change of spontaneous calcium signals ( $dF/F$ ) of SF-1 neurons before and after mice  
 26 entering open arms in both group (unpaired Student's *t*-test, control,  $P = 0.7844$ ; anxiety,  
 27  $P = 0.2520$ ). Data are means  $\pm$  SEM, \*  $P < 0.05$ .

28

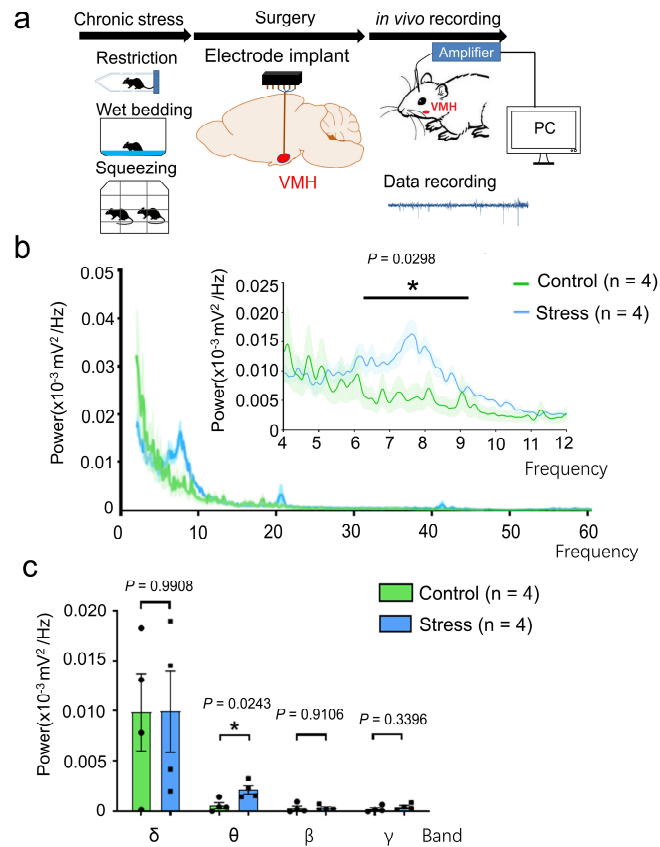

29

30 **Supplementary Figure 2. *In vivo* electrophysiology recording of dmVMH neurons**

31 **in control and stressed mice.**

32 **(a)** Schematic of *in vivo* electrophysiology recording of dmVMH neurons in mice of  
 33 control and stress group and related experimental strategy. **(b and c)** Power spectral  
 34 density of local field potential (LFP) in dmVMH after chronic stress, with significant  
 35 power improvement observed in theta band (two-way ANOVA,  $P = 0.0298$ ,  $F(1, 14) =$   
 36  $5.845$ ; unpaired Student's *t*-test,  $P = 0.0243$ ,  $n = 4$ ). Data are means  $\pm$  SEM, \*  $P < 0.05$ .

37

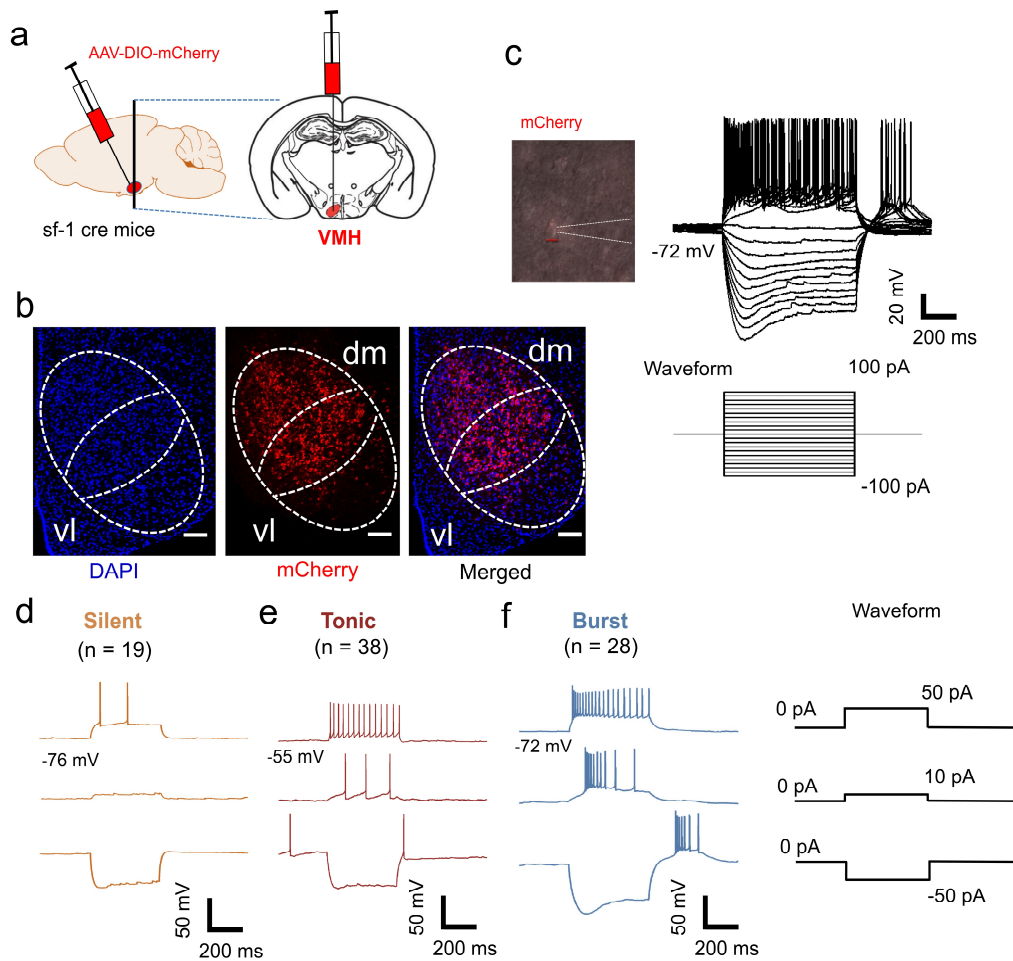

38

39 **Supplementary Figure 3. Electrophysiological properties of dmVMH neurons**  
 40 **subtypes.**

41 (a and b) Schematic of location of dmVMH in coronal section slice of mouse brain,  
 42 mCherry was specifically expressed in SF-1 (specific dmVMH marker) neurons. Scale  
 43 bar is 300  $\mu\text{m}$ . (c) Whole-cell recording trace from a dmVMH neuron, with current  
 44 injection of -100 pA to 100 pA and 10 pA/step. (d-f) Representative traces of whole-  
 45 cell recordings showing electrophysiological properties of silent (n = 19), tonic-firing  
 46 (n = 38), and bursting (n = 28) neuronal subtypes in dmVMH. Three subtypes exhibit  
 47 different electrophysiological activity at 50, 10, and -100 pA current injection.

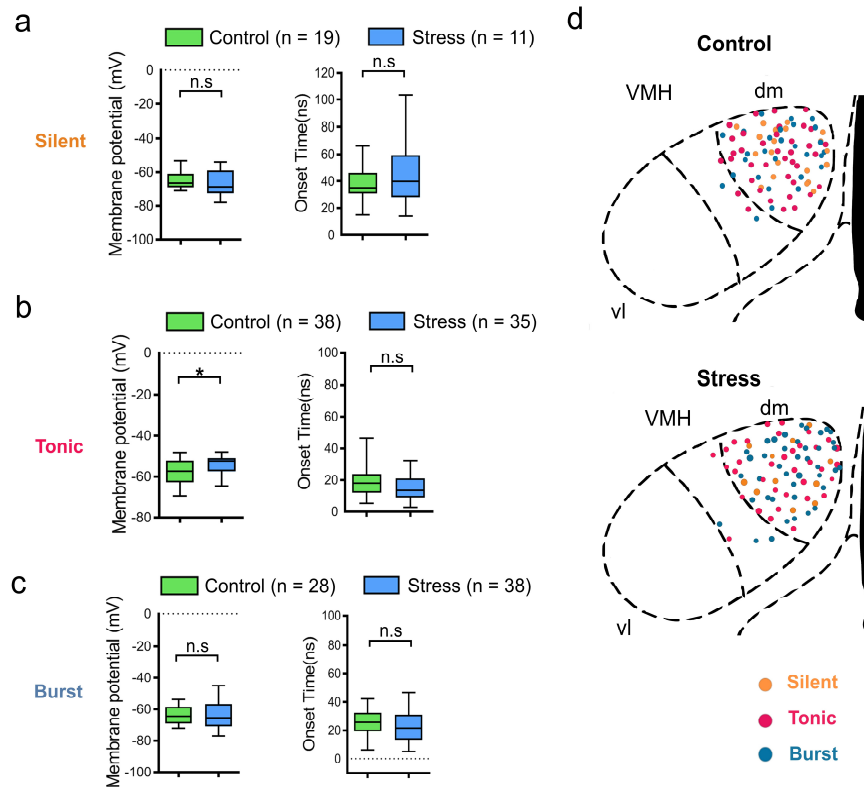

48

49 **Supplementary Figure 4. Electrophysiological comparison of three dmVMH**  
 50 **neuronal subtypes in control and stress groups.**

51 **(a)** Resting membrane potential (RMP) and onset time of silent neurons in control (19  
 52 cells) and stressed mice (11 cells) exhibit no obvious difference (unpaired Student's *t*-  
 53 test, RMP:  $P = 0.5549$ ; Onset time:  $P = 0.3029$ ). **(b)** RMP of tonic firing neurons in  
 54 control (38 cells) are higher than that of stressed mice (35 cells), while no obvious  
 55 difference observed in onset time (unpaired Student's *t*-test, RMP:  $P = 0.0047$ ; Onset  
 56 time:  $P = 0.0767$ ). **(c)** No obvious difference has been found in RMP and onset time of  
 57 burst firing neurons in control (28 cells) and chronically stress mice (38 cells) (unpaired  
 58 Student's *t*-test, RMP:  $P = 0.9452$ ; Onset time:  $P = 0.7704$ ). **(d)** Location of each  
 59 recorded neuron in dmVMH of control and stress group, no region specificity was

60 observed among three subtypes. Data are means  $\pm$  SEM; \* $P$  < 0.05, \*\* $P$  < 0.01. The  
61 box plotted at the median extending from the 25-75th percentile, and the whisker  
62 represents Min to Max distribution.  
63

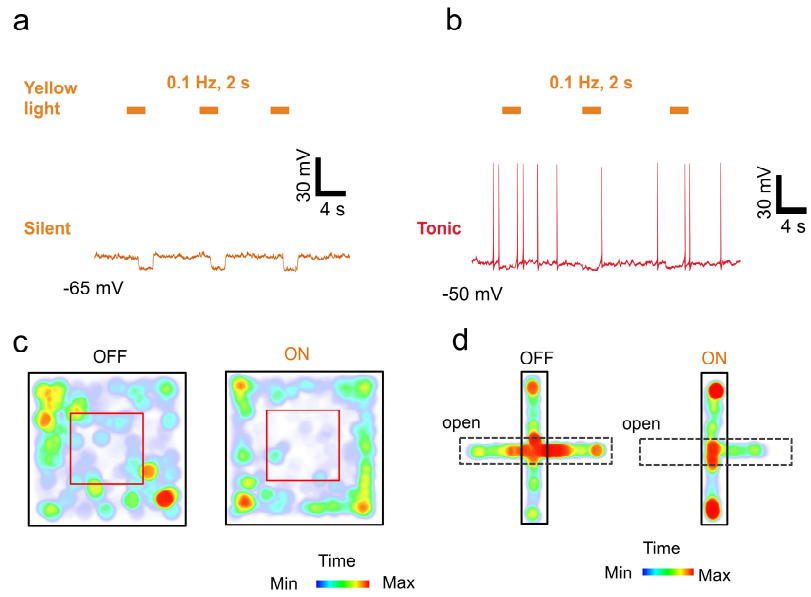

64

65 **Supplementary Figure 5. Optogenetic manipulation of VMH SF-1 neurons and**  
 66 **behavioral changes.**

67 (a and b) Yellow light illumination (0.1 Hz) exerted no significant influence on silent  
 68 or tonic-firing dmVMH neurons. (c and d) Optogenetically induced burst firing in  
 69 VMH caused anxiety-like behavior in mice. Residence time in each site of open field  
 70 before and during light illumination (blue, less time; red, more time); Residence time  
 71 in each site of elevated plus-maze before and during light illumination (blue, less time;  
 72 red, more time).

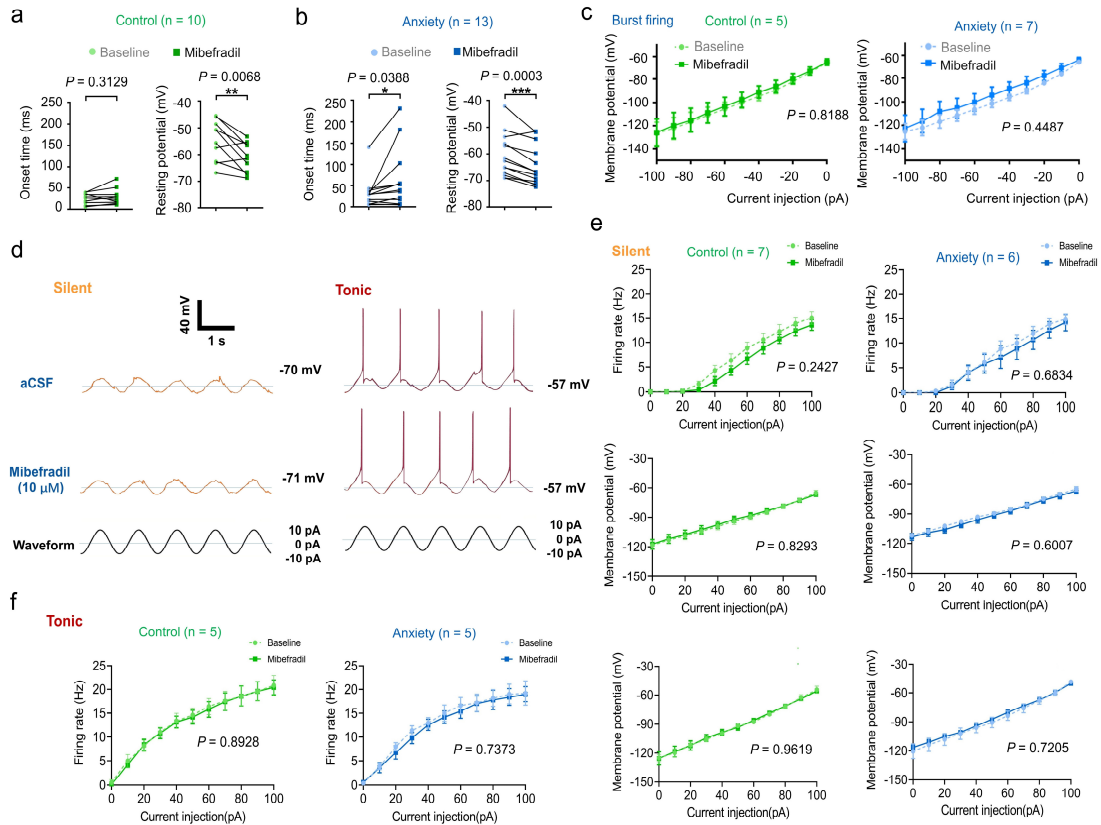

73

74 **Supplementary Figure 6. Effects of mibefradil on electrophysiology of VMH**

75 **neurons in control and anxiety group.**

76 **(a and b)** onset time and RMP of dmVMH neurons from wild-type (n = 10) and anxiety

77 groups (n = 13). Significant differences were observed in both onset time and RMP

78 (paired Student's *t*-test,  $P = 0.0388$  and  $P = 0.0003$ ) in the anxiety group, whereas the

79 control group only demonstrated obvious changes in RMP (paired Student's *t*-test, onset

80 time,  $P = 0.3129$ ; RMP:  $P = 0.0068$ ). (c) Mibefradil application exerted no obvious

81 influence on current-voltage curve of burst neurons (two-way ANOVA, control, n = 5 ,

82  $P = 0.8188$ ,  $F(1, 10) = 0.0573$ ; anxiety, n = 7,  $P = 0.4487$ ,  $F(1, 12) = 0.6218$ ).

83 Cosine current injecting into silent or tonic firing neurons failed to induced bursting. (e)

84 No obvious differences were observed in frequency-current curve (two-way ANOVA,



85 control,  $P = 0.2427$ ,  $F(1, 12) = 1.510$ ; anxiety,  $P = 0.6834$ ,  $F(1, 10) = 0.1763$  with  
86 Bonferroni correction) and subthreshold membrane potential (two-way ANOVA,  
87 control,  $P = 0.8293$ ,  $F(1, 12) = 0.1227$ ; anxiety,  $P = 0.6007$ ,  $F(1, 10) = 0.3770$ ) of  
88 dmVMH silent neurons of control ( $n = 7$  cells from 4 mice) and anxiety groups ( $n = 6$   
89 cells from 4 mice) after application of mibefradil. (f) Mibefradil exerted no obvious  
90 affect on the frequency-current curve (two-way ANOVA, control,  $P = 0.8928$ ,  $F(1, 8)$   
91  $= 0.0193$ ; anxiety,  $P = 0.7373$ ,  $F(1, 8) = 0.1206$ ) and subthreshold membrane potential  
92 (two-way ANOVA, control,  $P = 0.9619$ ,  $F(1, 8) = 0.0025$ ; anxiety,  $P = 0.7205$ ,  $F(1, 8)$   
93  $= 0.1374$ ) of dmVMH tonic firing neurons of control ( $n = 5$  cells from 3 mice) and  
94 anxiety groups ( $n = 5$  cells from 3 mice). Data are means  $\pm$  SEM, two-way ANOVA  
95 performed with Bonferroni correction, \*  $P < 0.05$ , \*\*  $P < 0.01$ , \*\*\*  $P < 0.001$ .  
96

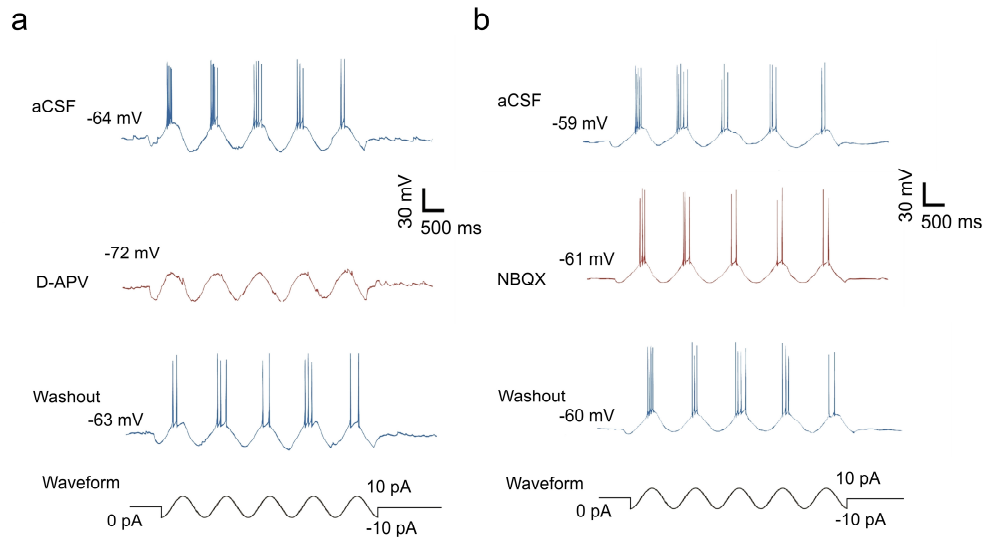

97

98 **Supplementary Figure 7. Glutamate receptor is critical for generation of burst**  
 99 **firing in dmVMH.**

100 **(a)** Application of D-AP5 blocked generation of burst firing induced by cosine  
 101 waveform current injection (-10 pA–10 pA, n = 5 cells). **(b)** Application of NBQX did  
 102 not abolish generation of burst firing (n = 5 cells).

103

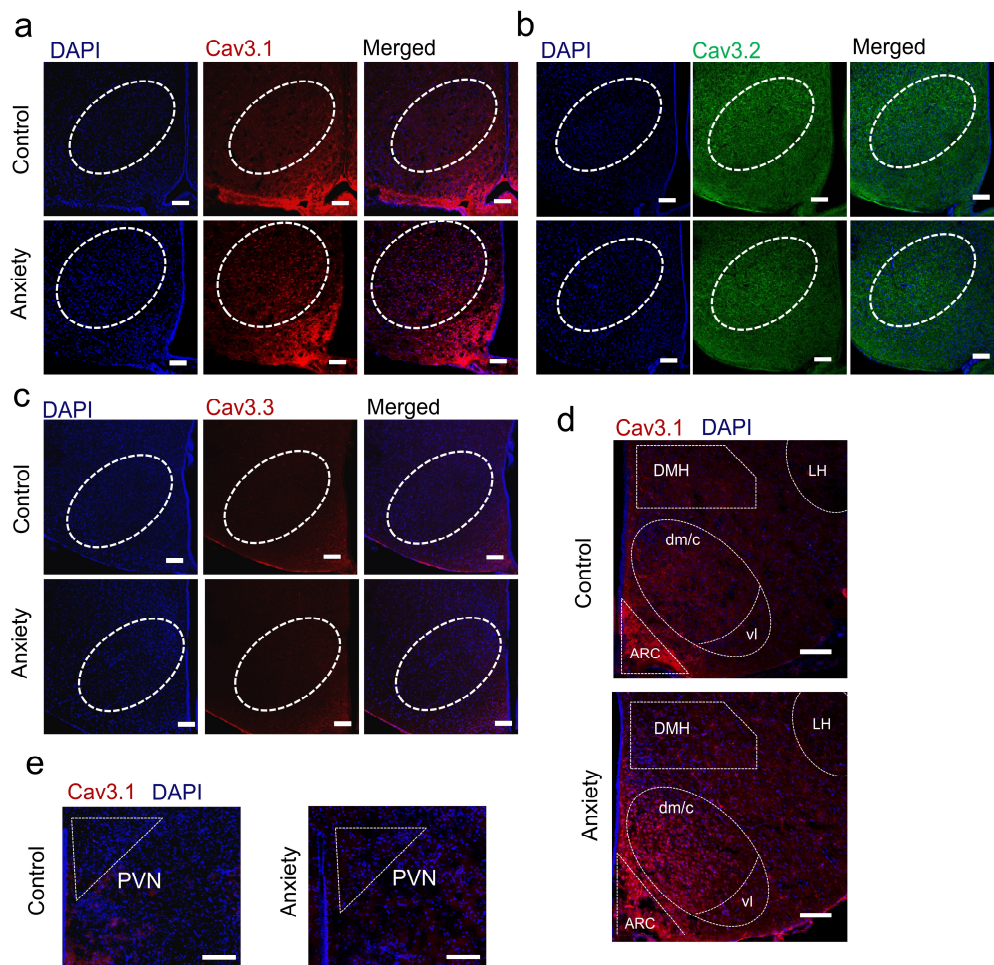

104

105 **Supplementary Figure 8. Immunostaining of three T-VGCC in VMH and other**

106 **hypothalamic regions. (a)** Representative images of VMH Cav 3.1 immunostaining in

107 mice of control and anxiety group. Slices from anxious mice exhibit higher Cav3.1

108 expression compared with the control mice. **(b)** Cav 3.2 and **(c)** Cav 3.3

109 immunostaining demonstrated no obvious difference between control and anxiety

110 group. **(d)** no obvious changes of Cav3.1 signals were observed in other hypothalamic

111 regions, including Arc, dorsomedial part (DMH), lateral part (LH) and paraventricular

112 nucleus (PVN), between control and anxiety groups. Scale bar: 100 μm

113

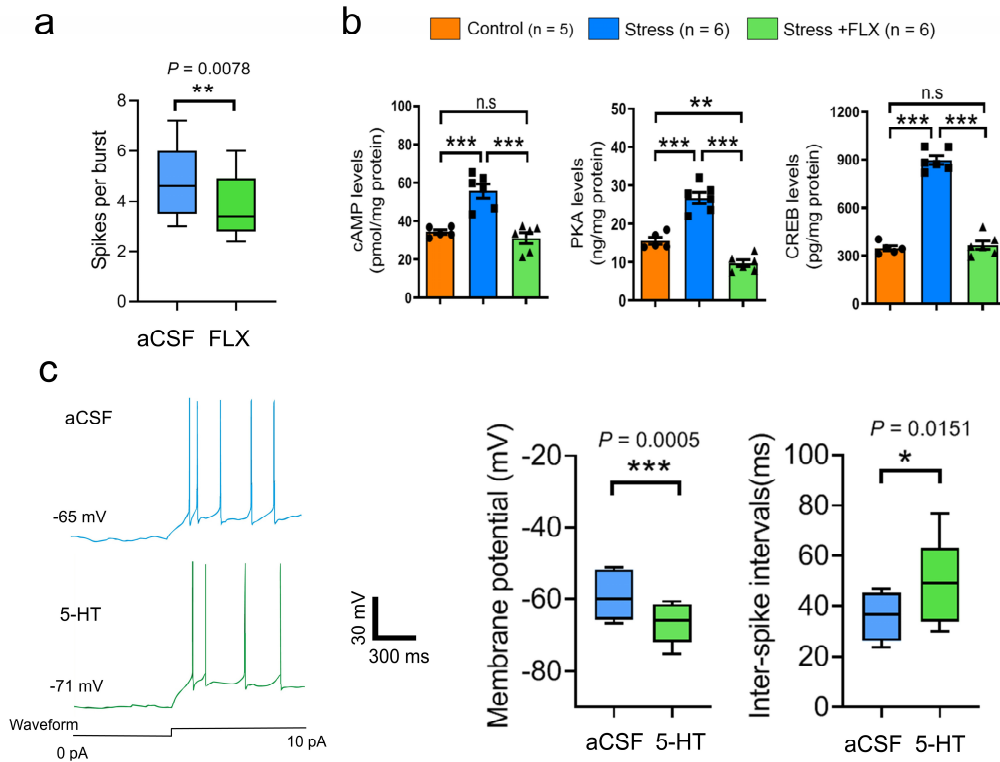

114

115 **Supplementary Figure 9. Effect of Fluoxetine on the activity and cAMP-PKA**  
 116 **signaling of dmVMH neurons.**

117 **(a)** Application of fluoxetine (FLX) suppressed burst firing induced by cosine  
 118 waveform current injection (-10 pA–10 pA, n = 5 cells from 4 mice, paired Student's *t*-  
 119 test,  $P = 0.0078$ ). **(b)** Application of FLX inhibited the enhanced cAMP-PKA signals  
 120 induced by chronic stress. One way ANOVA with Bonferroni correction, cAMP:  $P <$   
 121 0.0001; WT (n = 5 mice) versus stress group (n = 6 mice),  $P = 0.0004$ ; stress versus  
 122 stress + FLX group (n = 6 mice),  $P < 0.0001$ ; WT versus stress + FLX group,  $P >$   
 123 0.9999. PKA:  $P < 0.0001$ ; WT versus stress group,  $P < 0.0001$ ; stress versus stress +  
 124 FLX group,  $P < 0.0001$ ; WT versus stress + FLX group,  $P = 0.0091$ . CREB:  $P < 0.0001$ ;  
 125 WT versus stress group,  $P < 0.0001$ ; stress versus stress + FLX group,  $P < 0.0001$ ; WT

126 versus stress + FLX group,  $P > 0.9999$ . (C) 5-HT hyperpolarized dmVMH neurons and  
127 increased the ISI of burst firing neurons (paired Student's  $t$ -test,  $n = 6$  cells from 4 mice,  
128 membrane potential,  $P = 0.0005$ ; ISI,  $P = 0.0151$ ). The box plotted at the median  
129 extending from the 25-75th percentile, and the whisker represents Min to Max  
130 distribution. Data are means  $\pm$  SEM, \*  $P < 0.05$ , \*\*  $P < 0.01$ , \*\*\*  $P < 0.001$ .  
131
